# Supplementary material for: Phylogenetic analysis of migration, differentiation, and class switching in B cells
Source: PubMed Central journal article supplement (PMC9037912; doi:10.1371/journal.pcbi.1009885), 2022-04-25

Switches A to B = 2

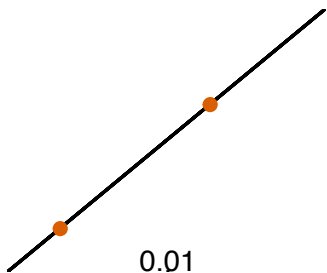

Switches B to A = 0

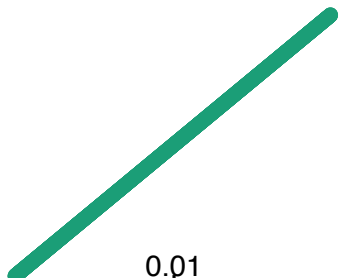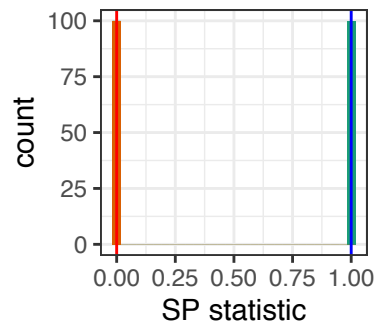

Switches A to B = 1

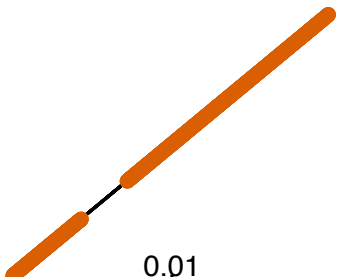

Switches B to A = 3

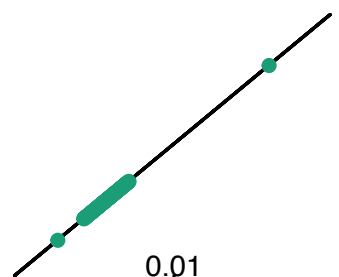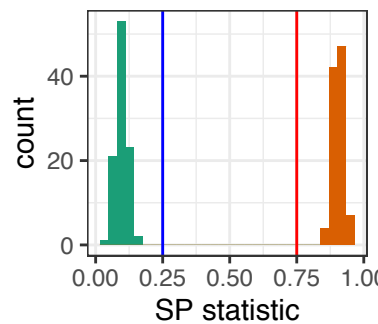

Switches A to B = 1

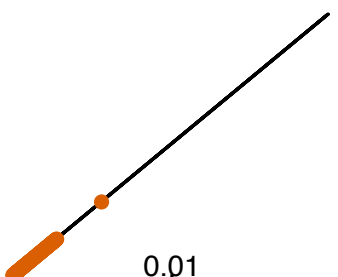

Switches B to A = 1

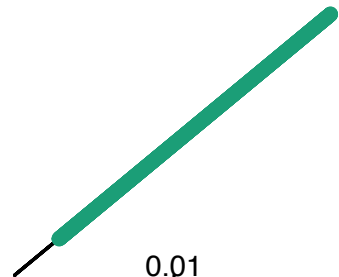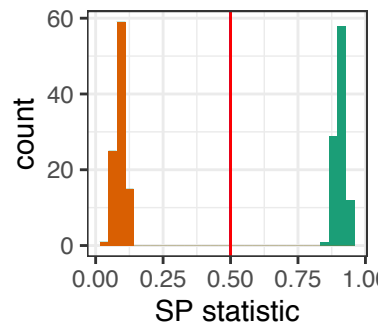

● A  
● B

Switches A to B = 1

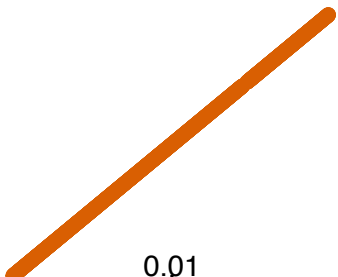

Switches B to A = 3

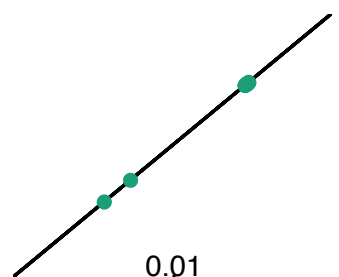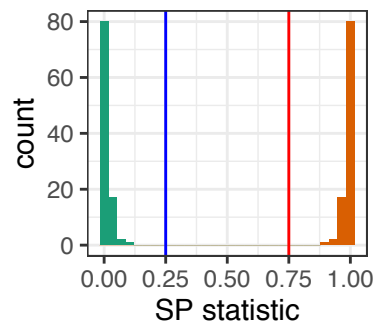

Switches A to B = 0

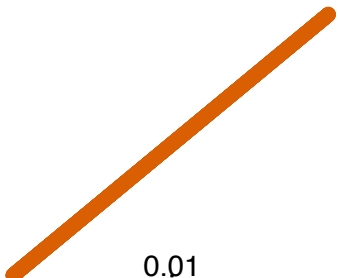

Switches B to A = 2

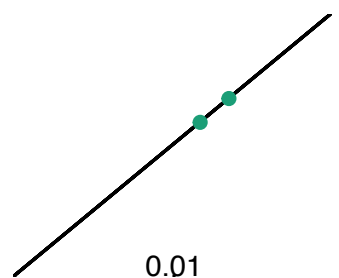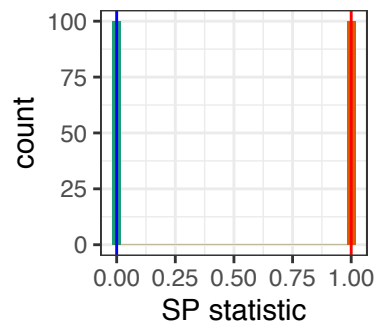

Supplement: pcbi.1009885.s008.pdf [file pcbi.1009885.s008.pdf]
