# Supplementary material for: Phylogenetic analysis of migration, differentiation, and class switching in B cells
Source: PubMed Central journal article supplement (PMC9037912; doi:10.1371/journal.pcbi.1009885), 2022-04-25
Supplement: pcbi.1009885.s004.pdf [file pcbi.1009885.s004.pdf]

Lineage tree with trait values at tips

Maximum parsimony trait reconstruction

Compare observed and randomized SP statistics to calculate p value

Germline

Randomize traits

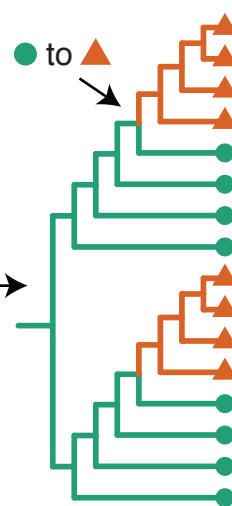

| Observed tree statistics |   | Switch proportion (SP) |
|--------------------------|---|------------------------|
| State changes            |   |                        |
| ● to ▲                   | 2 | 1.0                    |
| ▲ to ●                   | 0 | 0.0                    |

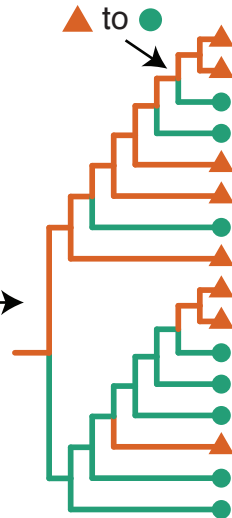

| Randomized tree statistics |   | Switch proportion (SP) |
|----------------------------|---|------------------------|
| State changes              |   |                        |
| ● to ▲                     | 2 | 0.33                   |
| ▲ to ●                     | 4 | 0.67                   |

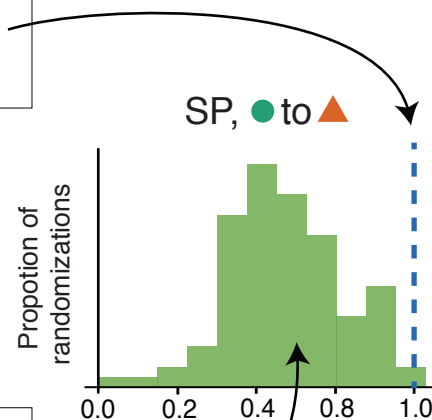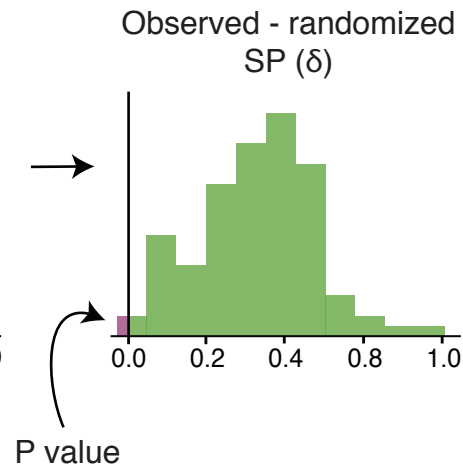

Repeat for 1000 randomizations, plot distribution

$P < 0.05$  indicates the tree has a significantly greater proportion of switches from ● to ▲ than expected from randomized trees
