# Supplementary material for: Phylogenetic analysis of migration, differentiation, and class switching in B cells
Source: PubMed Central journal article supplement (PMC9037912; doi:10.1371/journal.pcbi.1009885), 2022-04-25

SC test  $p$  value,  $\delta > 0$

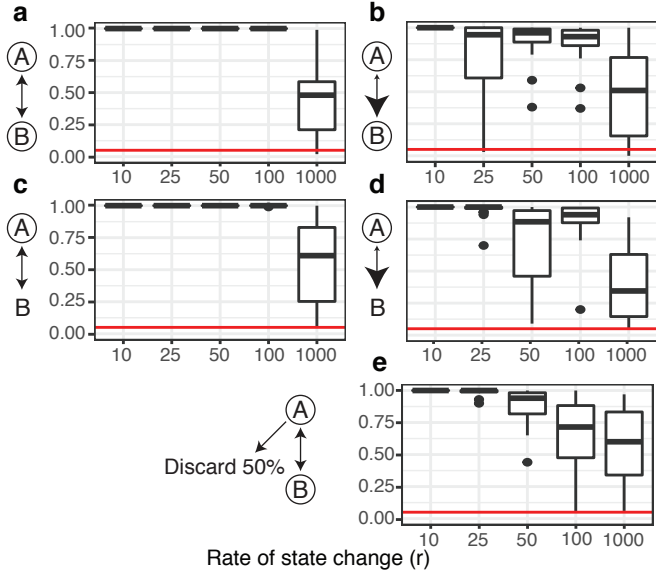

Supplement: pcbi.1009885.s006.pdf [file pcbi.1009885.s006.pdf]
