# Supplementary material for: Phylogenetic analysis of migration, differentiation, and class switching in B cells
Source: PubMed Central journal article supplement (PMC9037912; doi:10.1371/journal.pcbi.1009885), 2022-04-25

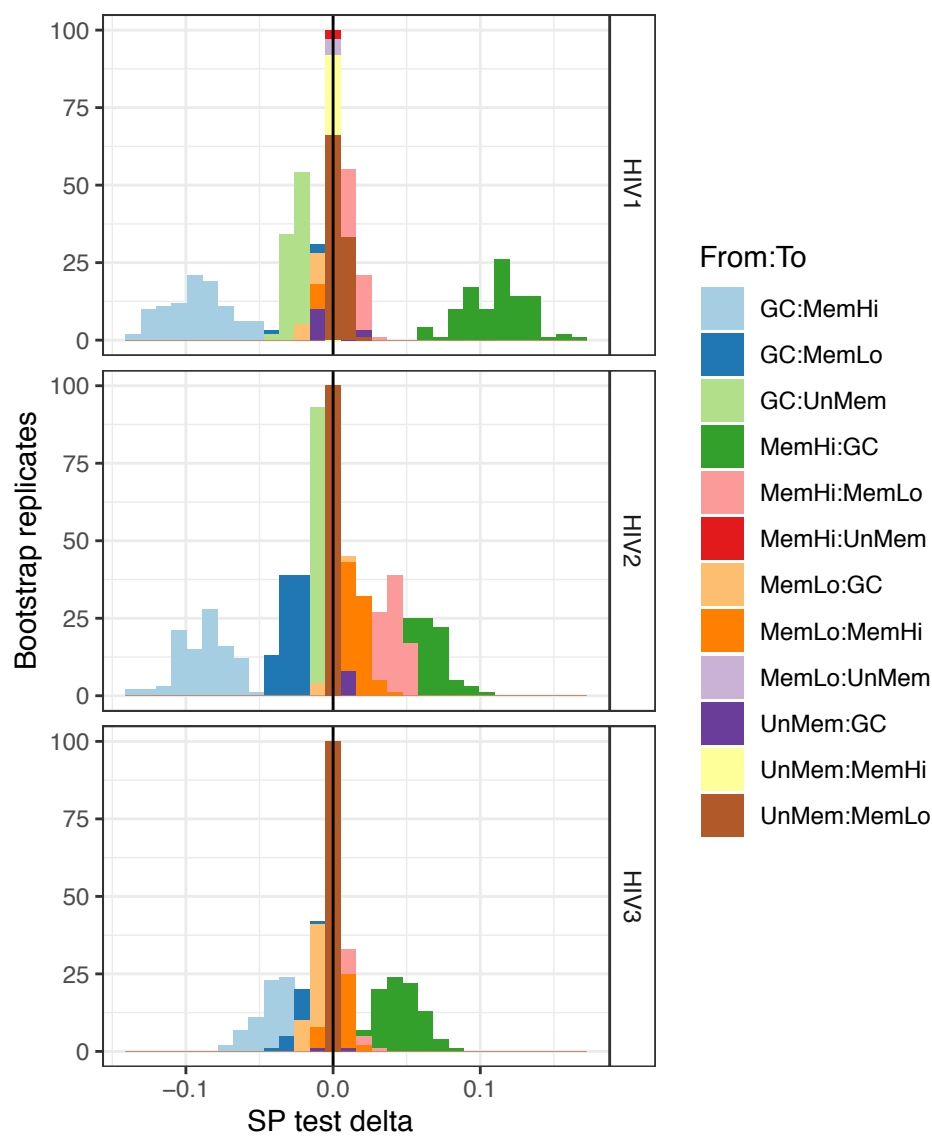

Supplement: pcbi.1009885.s012.pdf [file pcbi.1009885.s012.pdf]
